# Supplementary material for: Unveiling the impact of oxygen vacancies in engineered bimetallic oxides for enhanced oxygen evolution reaction: insights from experimental and theoretical approaches
Source: Royal Society of Chemistry journal article supplement (doi:10.1039/d4ta01180e), 2024-01-01
Supplement: d4ta01180e1.pdf [file d4ta01180e1.pdf]

# Unveiling the Impact of Oxygen Vacancies in Engineered Bimetallic Oxides for Enhanced Oxygen Evolution Reaction: Insights from Experimental and Theoretical Approaches

Pratheep Panneerselvam<sup>a</sup>, Chob Singh<sup>a</sup>, Santhosh Kumar Jayaraj<sup>a</sup>, Thamarainathan Doulassiramane<sup>b</sup>, Ramanathan Padmanaban<sup>b</sup> Akshaya K. Samal<sup>a</sup>, Sakar Mohan<sup>a</sup> and Arvind H. Jadhav<sup>a\*</sup>

<sup>a</sup> Centre for Nano and Material Sciences, JAIN University, Global Campus,  
Bangalore-562112, Karnataka, India.

<sup>b</sup> Department of Chemistry, School of Physical Chemical and Applied Sciences,  
Pondicherry University, Puducherry - 605 014, India.

\*Corresponding Author: j.arvind@jainuniversity.ac.in; jadhav.ah@gmail.com

## Supporting Information

### Data availability statements

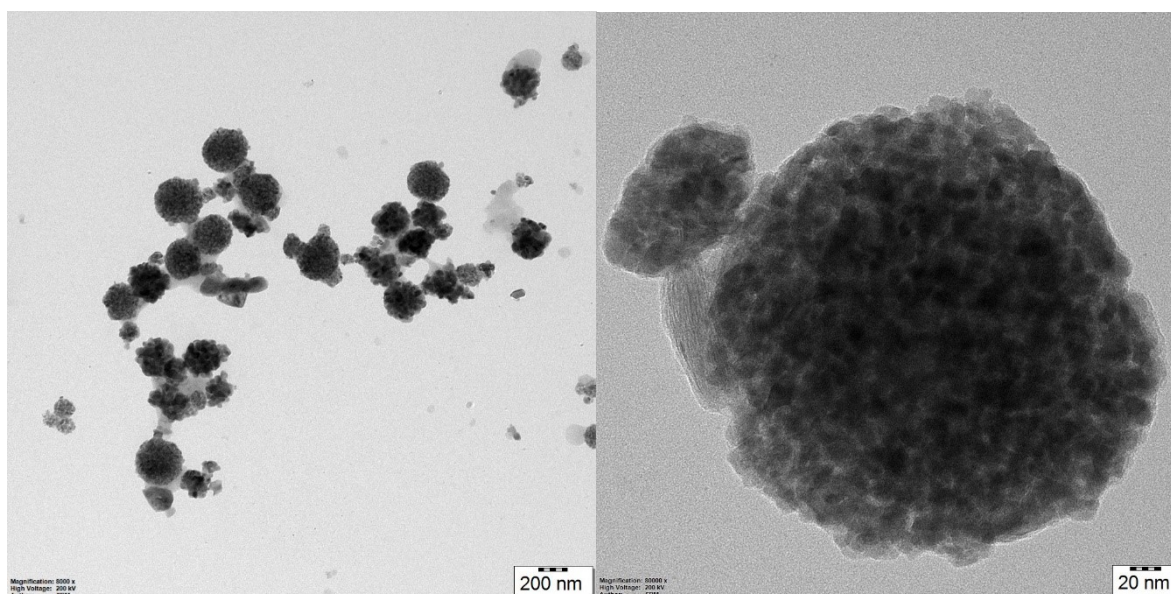

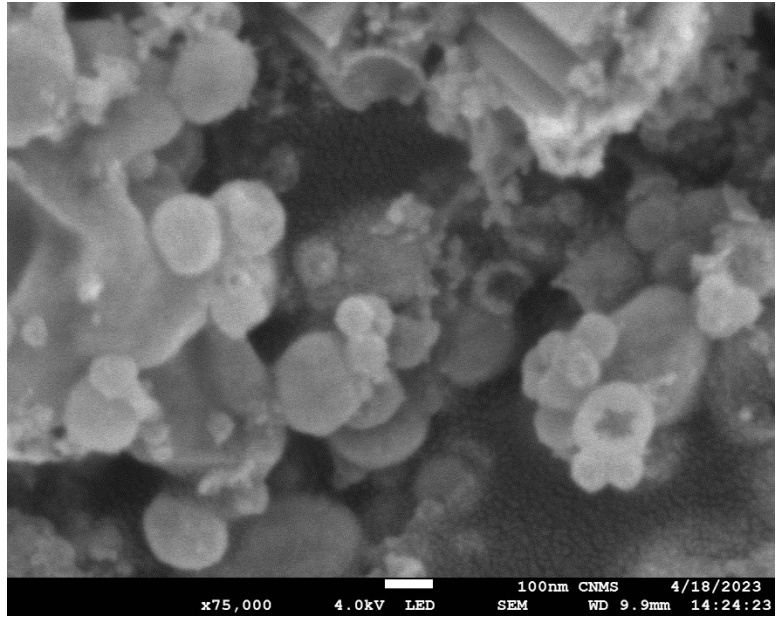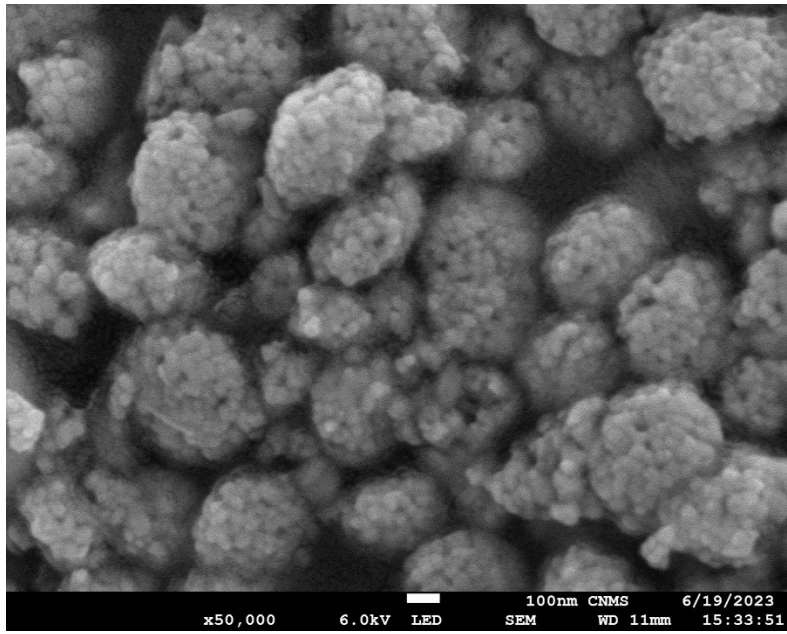

# Analysis Results

## General Information

|               |                     |                  |
|---------------|---------------------|------------------|
| Analysis date | 2023/08/23 11:25:28 | Measurement date |
| Sample name   | NMO-7c              | Operator         |
| File name     | NMO-7c.raw          |                  |
| Comment       |                     |                  |

## Measurement profile

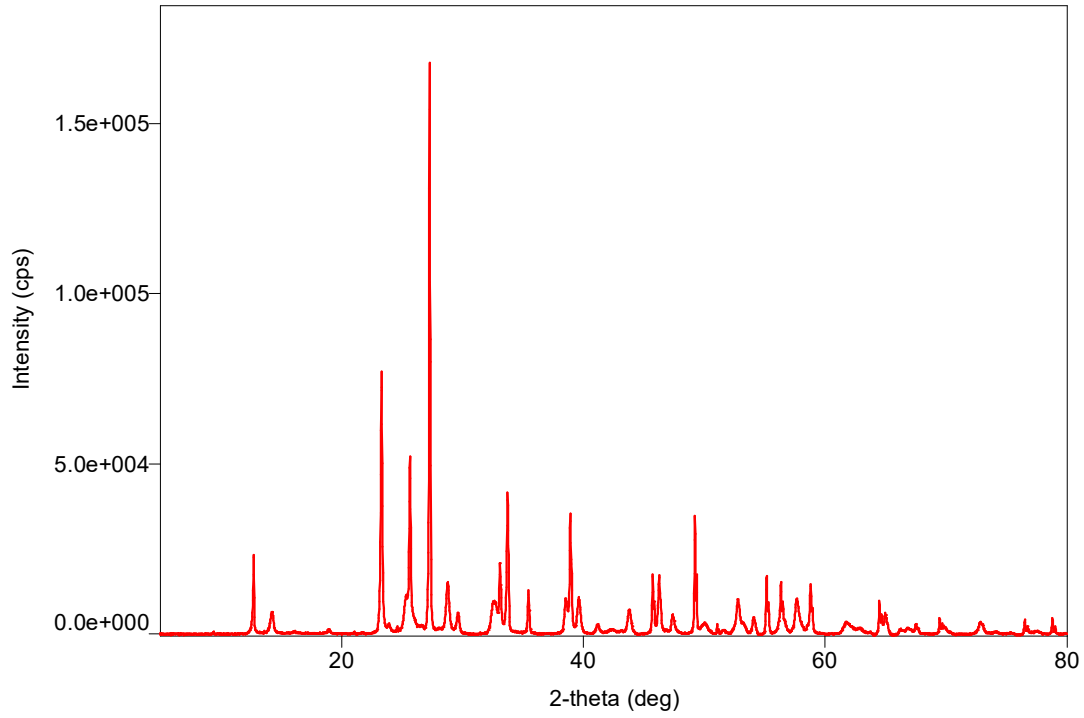

## Measurement conditions

|                       |               |                            |
|-----------------------|---------------|----------------------------|
| X-Ray                 | 40 kV , 30 mA | Scan speed / Duration time |
| Goniometer            |               | Step width                 |
| Attachment            | -             | Scan axis                  |
| Filter                | K-beta filter | Scan range                 |
| CBO selection slit    | -             | Incident slit              |
| Diffrected beam mono. |               | Length limiting slit       |
| Detector              | D/teX Ultra   | Receiving slit #1          |
| Scan mode             | CONTINUOUS    | Receiving slit #2          |

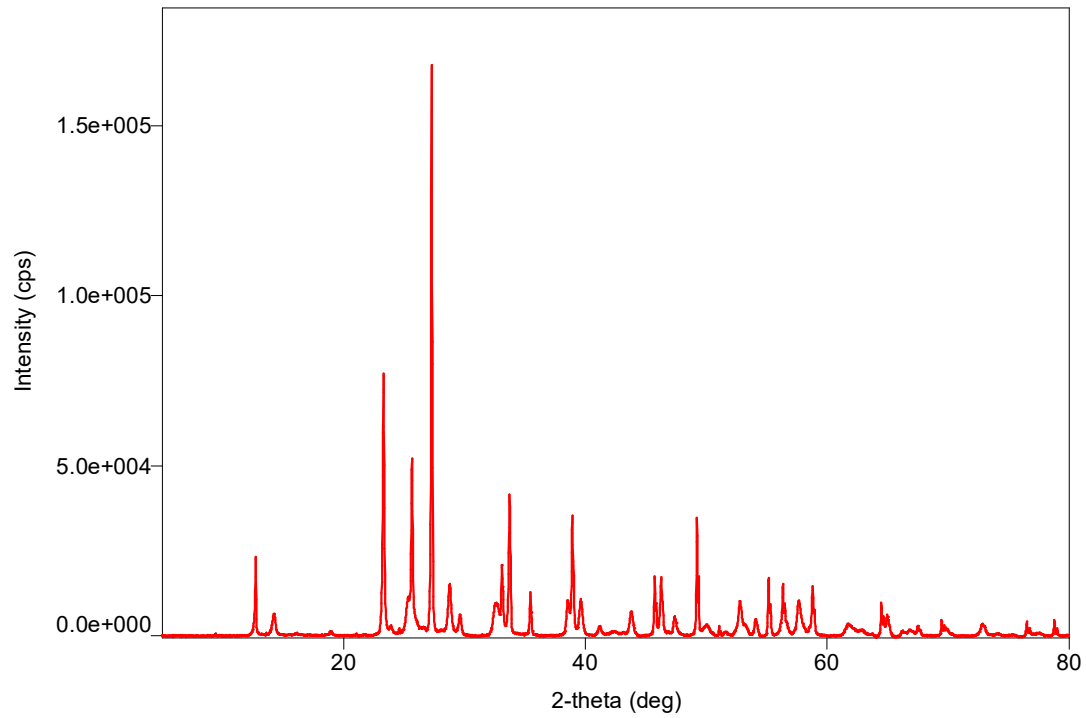

## Peak list

| No. | 2-theta(deg) | d(ang.)     | Height(cps) | FWHM(deg)  | Int. I(cps deg) |
|-----|--------------|-------------|-------------|------------|-----------------|
| 1   | 12.7482(18)  | 6.9383(10)  | 17753(211)  | 0.082(3)   | 2482(21)        |
| 2   | 14.258(6)    | 6.207(3)    | 4447(105)   | 0.287(6)   | 1895(23)        |
| 3   | 16.04(4)     | 5.520(15)   | 373(31)     | 0.75(9)    | 587(29)         |
| 4   | 18.950(19)   | 4.679(5)    | 892(47)     | 0.27(2)    | 414(16)         |
| 5   | 23.324(3)    | 3.8107(5)   | 55703(373)  | 0.137(4)   | 10300(88)       |
| 6   | 23.920(14)   | 3.717(2)    | 1154(54)    | 0.23(4)    | 288(67)         |
| 7   | 25.686(5)    | 3.4654(7)   | 34470(294)  | 0.122(10)  | 6697(322)       |
| 8   | 25.90(5)     | 3.437(7)    | 3141(89)    | 0.88(10)   | 4414(401)       |
| 9   | 27.311(2)    | 3.2628(2)   | 136801(585) | 0.087(2)   | 16270(189)      |
| 10  | 28.769(7)    | 3.1006(7)   | 10521(162)  | 0.275(6)   | 4121(44)        |
| 11  | 29.617(10)   | 3.0138(10)  | 4066(101)   | 0.220(10)  | 1169(29)        |
| 12  | 32.661(10)   | 2.7395(8)   | 6734(130)   | 0.443(16)  | 4131(109)       |
| 13  | 33.113(3)    | 2.7031(2)   | 14794(192)  | 0.134(6)   | 2737(74)        |
| 14  | 33.730(3)    | 2.6551(2)   | 33133(288)  | 0.123(4)   | 5658(68)        |
| 15  | 35.466(3)    | 2.52896(19) | 11223(168)  | 0.092(3)   | 1643(23)        |
| 16  | 38.562(3)    | 2.33279(19) | 7783(139)   | 0.174(8)   | 2068(51)        |
| 17  | 38.9436(16)  | 2.31078(9)  | 29439(271)  | 0.117(2)   | 5287(54)        |
| 18  | 39.622(7)    | 2.2728(4)   | 7501(137)   | 0.273(5)   | 2761(31)        |
| 19  | 41.158(10)   | 2.1914(5)   | 1702(65)    | 0.328(15)  | 600(21)         |
| 20  | 42.28(3)     | 2.1360(16)  | 644(40)     | 0.86(7)    | 592(39)         |
| 21  | 43.18(4)     | 2.0934(19)  | 391(31)     | 0.46(11)   | 192(49)         |
| 22  | 43.777(9)    | 2.0662(4)   | 4744(109)   | 0.317(7)   | 1620(58)        |
| 23  | 45.756(2)    | 1.98134(10) | 15900(199)  | 0.087(2)   | 1878(28)        |
| 24  | 46.291(3)    | 1.95967(12) | 13765(186)  | 0.151(4)   | 3225(34)        |
| 25  | 46.84(4)     | 1.9379(14)  | 300(27)     | 0.19(13)   | 89(20)          |
| 26  | 47.415(4)    | 1.91580(17) | 4560(107)   | 0.193(9)   | 1362(30)        |
| 27  | 49.2459(10)  | 1.84877(4)  | 33010(287)  | 0.0779(10) | 3497(29)        |
| 28  | 50.028(10)   | 1.8217(3)   | 2058(72)    | 0.62(2)    | 1723(39)        |
| 29  | 51.088(5)    | 1.78635(17) | 2509(79)    | 0.075(5)   | 202(12)         |
| 30  | 51.589(19)   | 1.7702(6)   | 753(43)     | 0.23(3)    | 187(16)         |
| 31  | 52.761(7)    | 1.7336(2)   | 7226(134)   | 0.257(12)  | 2399(129)       |
| 32  | 53.161(19)   | 1.7215(6)   | 2178(74)    | 0.40(5)    | 1131(124)       |
| 33  | 54.086(7)    | 1.6942(2)   | 4028(100)   | 0.186(11)  | 966(25)         |
| 34  | 55.178(3)    | 1.66321(10) | 16052(200)  | 0.107(3)   | 1977(48)        |
| 35  | 56.356(3)    | 1.63123(8)  | 12937(180)  | 0.103(5)   | 2279(78)        |
| 36  | 56.632(11)   | 1.6239(3)   | 2498(79)    | 0.22(3)    | 935(91)         |
| 37  | 57.665(9)    | 1.5973(2)   | 7505(137)   | 0.345(11)  | 3573(51)        |
| 38  | 58.61(3)     | 1.5737(7)   | 1856(68)    | 0.23(5)    | 582(153)        |
| 39  | 58.802(3)    | 1.56906(7)  | 12745(178)  | 0.115(5)   | 2016(131)       |
| 40  | 61.74(2)     | 1.5012(5)   | 2186(74)    | 0.64(8)    | 1499(249)       |
| 41  | 62.65(5)     | 1.4815(11)  | 983(50)     | 0.8(2)     | 886(227)        |
| 42  | 63.62(5)     | 1.4613(10)  | 209(23)     | 0.14(9)    | 31(19)          |
| 43  | 64.501(4)    | 1.44350(7)  | 8620(147)   | 0.124(3)   | 1135(40)        |
| 44  | 64.957(11)   | 1.4345(2)   | 4190(102)   | 0.297(19)  | 1326(41)        |
| 45  | 66.218(14)   | 1.4102(3)   | 1059(51)    | 0.20(3)    | 235(24)         |
| 46  | 66.87(3)     | 1.3980(6)   | 1007(50)    | 0.62(5)    | 688(39)         |
| 47  | 67.511(7)    | 1.38628(13) | 2564(80)    | 0.159(8)   | 448(28)         |
| 48  | 69.485(3)    | 1.35164(6)  | 4638(108)   | 0.103(4)   | 685(19)         |
| 49  | 69.865(7)    | 1.34521(11) | 1911(69)    | 0.193(13)  | 527(23)         |
| 50  | 70.236(15)   | 1.3390(3)   | 356(30)     | 0.13(4)    | 64(16)          |
| 51  | 72.826(14)   | 1.2976(2)   | 2689(82)    | 0.378(14)  | 1260(27)        |
| 52  | 73.59(2)     | 1.2860(3)   | 206(23)     | 0.11(5)    | 28(13)          |

|    |            |            |           |          |         |
|----|------------|------------|-----------|----------|---------|
| 53 | 74.047(19) | 1.2792(3)  | 468(34)   | 0.31(5)  | 182(16) |
| 54 | 76.533(5)  | 1.24376(7) | 3593(95)  | 0.124(6) | 548(21) |
| 55 | 77.45(4)   | 1.2312(5)  | 470(34)   | 0.65(8)  | 377(28) |
| 56 | 78.806(3)  | 1.21347(4) | 4343(104) | 0.102(4) | 597(13) |
